# Supplementary material for: A c-di-AMP riboswitch controlling kdpFABC operon transcription regulates the potassium transporter system in Bacillus thuringiensis
Source: PubMed Central journal article supplement (PMC6488665; doi:10.1038/s42003-019-0414-6), 2019-04-29
Supplement: 42003_2019_414_MOESM3_ESM.pdf [file 42003_2019_414_MOESM3_ESM.pdf]

## Supplementary Figure 1

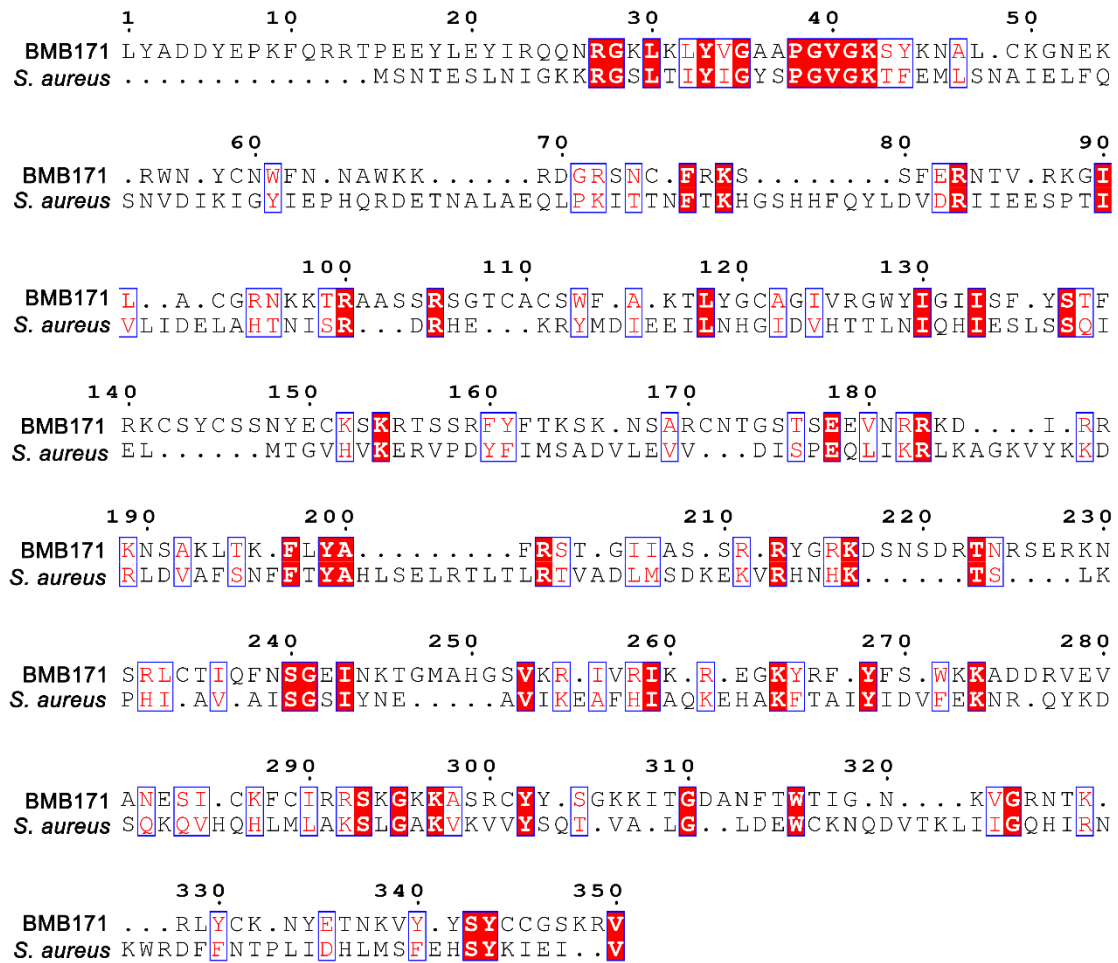

**Supplementary Figure 1. Alignment of KdpD of BMB171 (*Bacillus thuringiensis* BMB171) with N-terminal domain of *S. aureus* (*Staphylococcus aureus* NCTC 8325).** White letters shaded in red denote the conserved nucleotides. The similarity is only 9.1%.

## Supplementary Figure 2

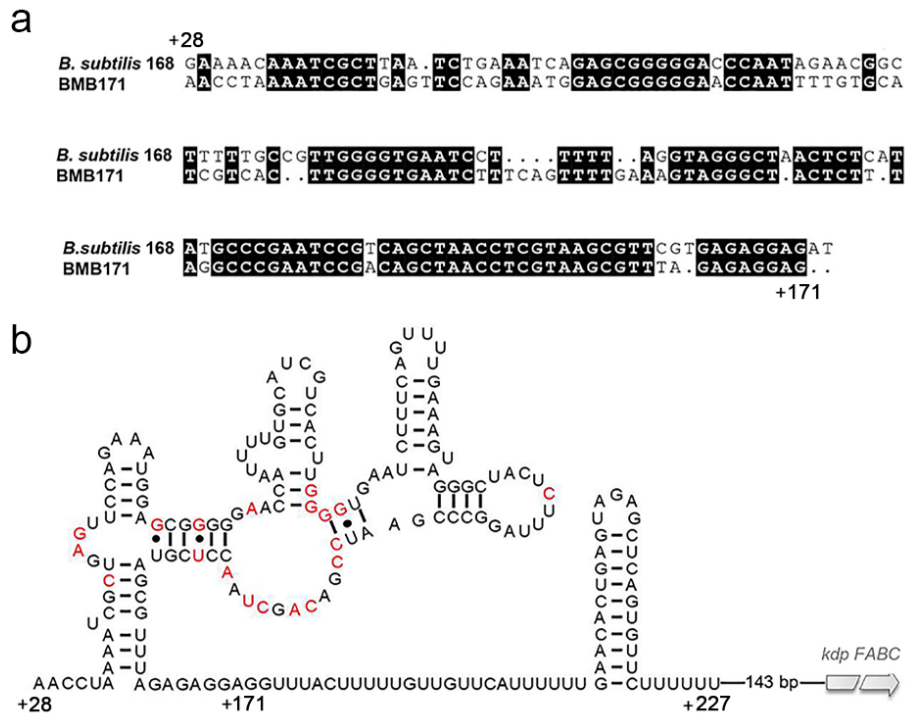

**Supplementary Figure 2. A conserved c-di-AMP riboswitch encoding region within the 5'-UTR encoding region of *kdp* operon. a** Sequence alignment of the aptamer domains in c-di-AMP riboswitch between BMB171 and *B. subtilis* 168, with white letters shaded in black denoting the conserved nucleotides. **b** The predicted secondary structure of c-di-AMP riboswitch. The distance from the 3' terminal of c-di-AMP riboswitch to the first nucleotide of the start codon is 143 bp.

### Supplementary Figure 3

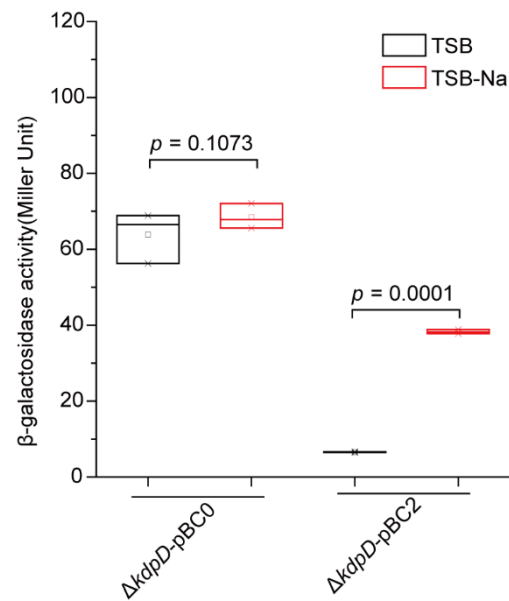

**Supplementary Figure 3** The  $\beta$ -galactosidase activities for  $\Delta kdpD$  carrying plasmids with (pBC2) and without the c-di-AMP riboswitch encoding region (pBC0) at different  $K^+$  concentrations. Data are expressed as box-and-whisker plots, where the central lines denote medians, edges represent upper and lower quartiles and whiskers show minimum and maximum values. Data were subjected to one-way analysis of variance (ANOVA) using the Bonferroni test,  $n = 3$ ,  $p$ -values are shown above each panel.

## Supplementary Figure 4

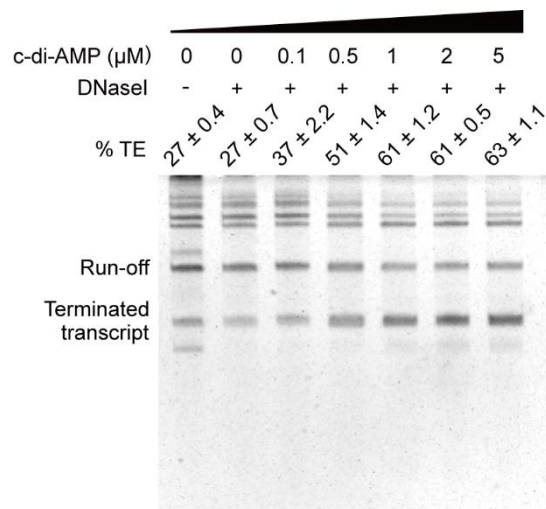

Supplementary Figure 4. *In vitro* transcription assay conducted in the presence of various c-di-AMP concentrations ranging from 0 to 5  $\mu\text{M}$ .

## Supplementary Figure 5

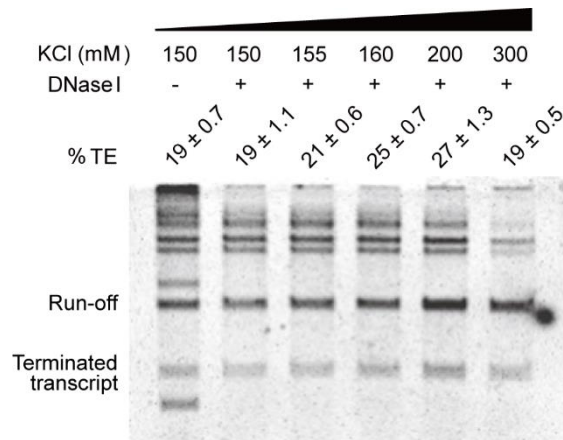

Supplementary Figure 5. *In vitro* transcription assay conducted in the presence of various  $K^+$  concentrations ranging from 150 to 300 mM.

## Supplementary Figure 6

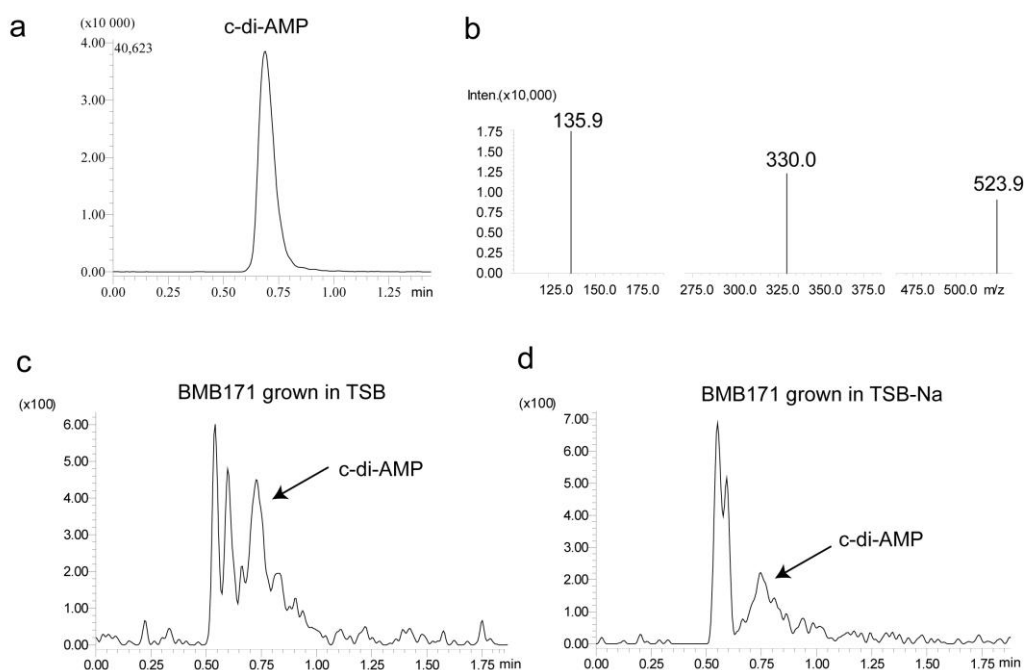

**Supplementary Figure 6. Quantification of intracellular c-di-AMP concentration by LC-MS/MS.** **a** LC-MS/MS chromatogram of the c-di-AMP standard detected using the  $m/z$  fragments at 135.9, 330.0 and 523.9. **b** Mass spectrum of daughter ions  $m/z$  135.9, 330.0 and 523.9 from parent ions  $m/z$  659.0 and 660.0. **c** and **d** Determination of c-di-AMP extracted from BMB171 strain grown in TSB and TSB-Na, respectively.

## Supplementary Figure 7

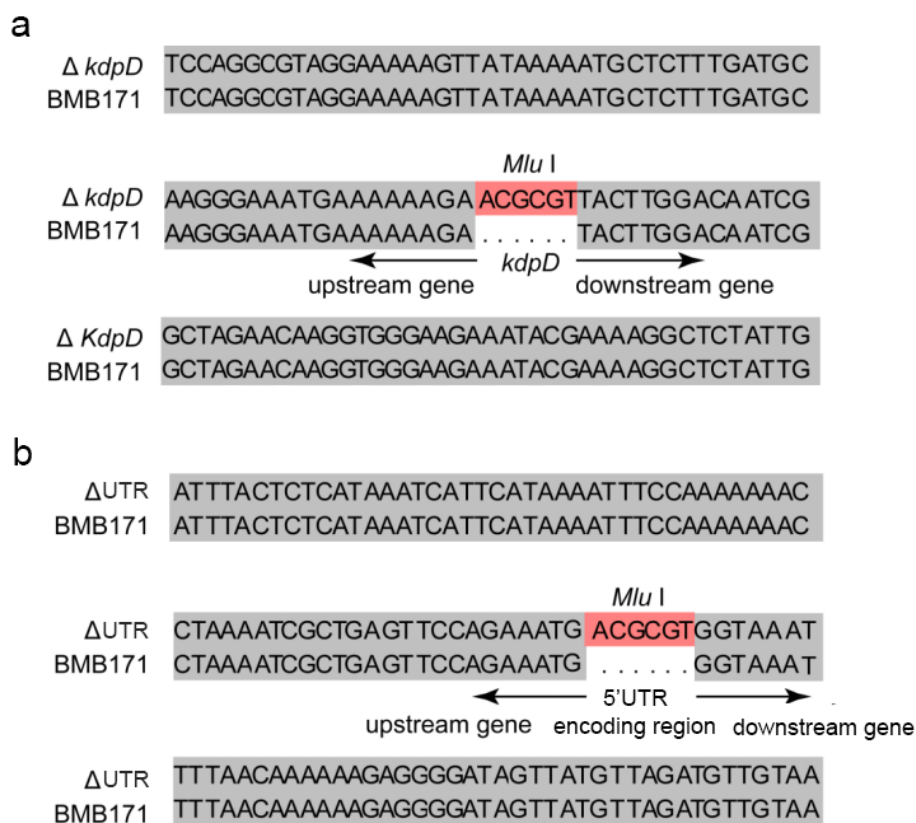

**Supplementary Figure 7.** Verification of  $\Delta kdpD$  and  $\Delta UTR$  by sequencing. **a** Sequence alignment of PCR products amplified from the  $\Delta kdpD$  genomic DNA and the BMB171 genomic DNA using primer pair *kdpC-F/ kdpD-DR* (*Bam*H I). The PCR products (about upstream 100 bp and downstream 100 bp sequences of *kdpD*) were shown. **b** Sequence alignment of PCR products amplified from the  $\Delta UTR$  genomic DNA and the BMB171 genomic DNA using primer pair UTR-UUF/UTR-DR (*Bam*H I). The PCR products (about upstream 100 bp and downstream 100 bp sequences of c-di-AMP riboswitch) were shown.

**Supplementary Table 1. Primers used in this study**

| Primers                           | Consequence                                 | Purposes                                                                  | Origins   |
|-----------------------------------|---------------------------------------------|---------------------------------------------------------------------------|-----------|
| <i>kdpA</i> -F                    | CGTTAGATGGGGCGGTTACA                        |                                                                           | This work |
| <i>kdpA</i> -R                    | GTGACACGAAAAGGATGCGG                        |                                                                           | This work |
| <i>kdpB</i> -F                    | GGCGGTGATTTTGTTCGGT                         | RT-qPCR                                                                   | This work |
| <i>kdpB</i> -R                    | AAATCGGCAACGTCACAACG                        |                                                                           | This work |
| <i>kdpC</i> -F                    | AATCGGGCAAACTTCACGG                         |                                                                           | This work |
| <i>kdpC</i> -R                    | ATATGCGATCCACCTGCACA                        |                                                                           | This work |
| <i>gapdh</i> -F                   | TTTTGCTAGCGCTTTCGCAG                        |                                                                           | This work |
| <i>gapdh</i> -R                   | TAGCGCCTGTTGTGAAGGTG                        | RT-qPCR, internal control                                                 | This work |
| 16S-F                             | CCGCCCTTTAGTGCTGAAG                         |                                                                           | This work |
| 16S-R                             | CTTGTGCGGGCCCCCGTCAATTC                     |                                                                           | This work |
| Primer-8                          | TTTTTTTTTTTTTTTT                            | 5'-RACE                                                                   |           |
| UTR-R(5'-RACE)                    | AACTGAAAGATTACCCCAAGTGACGA                  |                                                                           | This work |
| <i>Pkdp</i> -F ( <i>Nco</i> I)    | CATGCCATGGAATAACAGTAATAATCTTCA<br>ATGTA     | Plasmids pBC0 and pBC2<br>construction                                    | This work |
| <i>Pkdp</i> -R1 ( <i>Bam</i> H I) | CGGGATCCGAGAGTAAATATACTCCTCTAT<br>AT        | Plasmid pBC0 construction                                                 | This work |
| 0647-R ( <i>Bam</i> HI)           | CGGGATCCTTTTTGTAAAAATTACCATT<br>AAATATTAATA | Plasmid pBC2 construction                                                 | This work |
| UTR-UF( <i>Hind</i> III)          | CCCAAGCTT<br>GAGGATGAGGTACATGGAECTA         |                                                                           | This work |
| UTR-UR ( <i>Mlu</i> I)            | CGACGCGT<br>CATTCTGGAACCTCAGCGATTTTAG       | Plasmid pRP1028-UTR-UD<br>construction                                    | This work |
| UTR-DF ( <i>Mlu</i> I)            | CGACGCGTGGTAAATTTAACAAAAAGAG<br>GGGA        |                                                                           | This work |
| UTR-DR( <i>Bam</i> H I)           | CG GGATCC ATCCACCGCGTTATTTCCAAG             |                                                                           | This work |
| UTR-UUF                           | CTTCGTAAGCGTCTTGAGAGAGGAC                   | For c-di-AMP riboswitch<br>encoding region deleted<br>candidate screening | This work |
| pRP1028-R                         | GTGCGAATAAGGGACAGTGAAGAAGG                  |                                                                           | This work |
| <i>kdpD</i> -UF ( <i>Sma</i> I)   | TCCCCGGG<br>AATTAACATCACCCTGTCAGCG          |                                                                           | This work |
| <i>kdpD</i> -UR ( <i>Mlu</i> I)   | CG ACGCGT TCTTTTTTCATTTCCCTTGCATC           | Plasmid pRP1028- <i>kdpD</i> -UD<br>construction                          | This work |
| <i>kdpD</i> -DF ( <i>Mlu</i> I)   | CGACGCGT<br>TACTTGGACAATCGGCTAGAACA         |                                                                           | This work |
| <i>kdpD</i> -DR( <i>Bam</i> H I)  | CG GGATCC<br>ATTATGCAGCTCGTATATGGACC        |                                                                           | This work |
| <i>kdpC</i> -F                    | AATCGGGCAAACTTCACGG                         | For chromosomal <i>kdpD</i> gene<br>deleted candidate screening           |           |
| pRP1028-R                         | GTGCGAATAAGGGACAGTGAAGAAGG                  |                                                                           | This work |
| Eco-P                             | CAATGTAAGCGTTTAAATGAATG                     | <i>In vitro</i> transcription                                             | This work |
| ZL-2R                             | TCCTTCTTTCACAACCTTATCTGACCAACT              |                                                                           | This work |



**Supplementary Table 2. Strains used in this study**

| <b>Strains</b>              | <b>Relevant characteristics</b>                                                                                                                                                             | <b>Origins</b>                    |
|-----------------------------|---------------------------------------------------------------------------------------------------------------------------------------------------------------------------------------------|-----------------------------------|
| <i>E. coli</i> DH5 $\alpha$ | F- $\Phi$ 80 <i>lacZ</i> $\Delta$ M15 $\Delta$ ( <i>lacZYA-argF</i> ) U169 <i>recA1 endA1 hsdR17</i> (rk <sup>-</sup> , mk <sup>+</sup> ) <i>phoA supE44 thi-1 gyrA96 relA1</i> $\lambda$ - | Beijing TransGen Biotech Co., Ltd |
| BMB171                      | <i>B. thuringiensis</i> strain BMB171; an acrySTALLIFEROUS mutant strain; high transformation frequency                                                                                     | 3, 4                              |
| $\Delta$ <i>cdaA</i>        | In frame deletion of <i>cdaA</i> in BMB171                                                                                                                                                  | 5                                 |
| $\Delta$ <i>disA</i>        | In frame deletion of <i>disA</i> in BMB171                                                                                                                                                  | 5                                 |
| $\Delta$ UTR                | In frame deletion of c-di-AMP riboswitch in BMB171                                                                                                                                          | This work                         |
| $\Delta$ <i>kdpD</i>        | In frame deletion of <i>kdpD</i> in BMB171                                                                                                                                                  | This work                         |
| BMB171-pBC0                 | Derivate strain of BMB171 carrying the pBC0 plasmid                                                                                                                                         | This work                         |
| BMB171-pBC2                 | Derivate strain of BMB171 carrying the pBC2 plasmid                                                                                                                                         | This work                         |
| $\Delta$ <i>cdaA</i> -pBC0  | Derivate strain of $\Delta$ <i>cdaA</i> carrying the pBC0 plasmid                                                                                                                           | This work                         |
| $\Delta$ <i>cdaA</i> -pBC2  | Derivate strain of $\Delta$ <i>cdaA</i> carrying the pBC2 plasmid                                                                                                                           | This work                         |
| $\Delta$ <i>disA</i> -pBC0  | Derivate strain of $\Delta$ <i>disA</i> carrying the pBC0 plasmid                                                                                                                           | This work                         |
| $\Delta$ <i>disA</i> -pBC2  | Derivate strain of $\Delta$ <i>disA</i> carrying the pBC2 plasmid                                                                                                                           | This work                         |

**Supplementary Table 3. Plasmids used in this study**

| Plasmids                 | Relevant characteristics                                                                                                                                                                   | Purposes                                     | Origins   |
|--------------------------|--------------------------------------------------------------------------------------------------------------------------------------------------------------------------------------------|----------------------------------------------|-----------|
| pHT1K- <i>lacZ</i>       | <i>B. thuringiensis-E. coli</i> shuttle plasmid; Amp <sup>R</sup> Erm <sup>R</sup> , pHT1K plasmid harboring the promoter-less <i>lacZ</i> gene, for $\beta$ -galactosidase activity assay | $\beta$ -Galactosidase assays                | 1         |
| pBC0                     | <i>Kdp</i> promoter cloned between <i>Nco</i> I and <i>Bam</i> H I sites of pHT1K- <i>lacZ</i> , for $\beta$ -galactosidase activity assay                                                 | $\beta$ -Galactosidase assays                | This work |
| pBC2                     | <i>Kdp</i> promoter and c-di-AMP riboswitch coding region cloned between <i>Nco</i> I and <i>Bam</i> H I sites of pHT1K- <i>lacZ</i> , for $\beta$ -galactosidase activity assay           | $\beta$ -Galactosidase assays                | This work |
| pRP1028                  | <i>B. thuringiensis-E. coli</i> shuttle plasmid; Amp <sup>R</sup> Erm <sup>R</sup> ; containing <i>turbo-rfp</i> gene and an I- <i>Sce</i> I recognition site                              | Gene deletion                                | 2         |
| pSS4332                  | <i>B. thuringiensis-E. coli</i> shuttle plasmid; Km <sup>R</sup> ; containing <i>gfp</i> and I- <i>Sce</i> I restriction enzyme encoding gene                                              | Gene deletion                                | 2         |
| pSS1827                  | The helper plasmid for conjugative transfer; Amp <sup>R</sup>                                                                                                                              | Gene deletion                                | 2         |
| pRP1028-UTR-UD           | pRP1028 with the upstream and downstream regions of c-di-AMP riboswitch, an intermediate plasmid in gene deletion experiments                                                              | c-di-AMP riboswitch encoding region deletion | This work |
| pRP1028- <i>kdpD</i> -UD | pRP1028 with the upstream and downstream regions of <i>kdpD</i> gene, an intermediate plasmid in gene deletion experiments                                                                 | <i>kdpD</i> deletion                         | This work |

### Supplementary References

1. Wang, J. P., Ai, X. L., Mei, H., Fu, Y., Chen, B., Yu, Z.N. & He, J. High-throughput identification of promoters and screening of highly active promoter-5' UTR DNA region with different characteristics from *Bacillus thuringiensis*. *PLoS ONE*, **8**, e62960 (2013).
2. Janes, B. K. & Stibitz, S. Routine markerless gene replacement in *Bacillus anthracis*. *Infect Immun*, **74**, 1949-1953 (2006).
3. Li, L., Shao, Z., & Yu, Z. Transformation of *Bacillus thuringiensis* recipient BMB171 by electroporation. *Wei Sheng Wu Xue Tong Bao*, **27**, 331-334 (2000).
4. Li, L., Yang, C., Liu, Z., Li, F., & Yu, Z. Screening of acrySTALLIFEROUS mutants from *Bacillus thuringiensis* and their transformation properties. *Wei Sheng Wu Xue Bao*, **40**, 85-90 (2000).
5. Zheng, C., Ma, Y., Wang, X., Xie, Y., Ali, M. K., & He, J. Functional analysis of the sporulation-specific diadenylate cyclase CdaS in *Bacillus thuringiensis*. *Front Microbiol*, **6**, 908 (2015).
